# Supplementary material for: Source Identification and Genome-Wide Association Analysis of Crown Rot Resistance in Wheat
Source: MDPI journal article supplement (doi:10.3390/plants11151912), 2022-07-24
Supplement: s1 [file s1]

**Table S1.** Excellent varieties/lines resistant to CR in two years.

| years | Varieties            | DI   | Resistance | Types         | W&S | Sources                                               |
|-------|----------------------|------|------------|---------------|-----|-------------------------------------------------------|
| 2019  | Fielder              | 5.6  | R          | cultivar      | S   | the United States                                     |
|       | Chaodasui            | 6.7  | R          | cultivar      | I   | China                                                 |
|       | Zimai12              | 6.7  | R          | cultivar      | I   | Huang-huai Winter Wheat Region                        |
|       | Huximai              | 10.8 | R          | landrace      | I   | Winter Wheat Region of Middle and Lower Yangtze River |
|       | SIRMIONE             | 11.7 | R          | cultivar      | W   | Italy                                                 |
|       | Xinong509            | 11.8 | R          | cultivar      | I   | Huang-huai Winter Wheat Region                        |
|       | Hyden                | 12.5 | R          | cultivar      | S   | Australia                                             |
|       | Sifangmai            | 13   | R          | landrace      | S   | Southwestern Winter Wheat Region                      |
|       | Dawson               | 13   | R          | cultivar      | W   | Canada                                                |
|       | Ji954072             | 13   | R          | breeding line | W   | Huang-huai Winter Wheat Region                        |
|       | Mazhamai             | 13.5 | R          | landrace      | I   | Huang-huai Winter Wheat Region                        |
|       | Zhengmai9405         | 14.9 | R          | cultivar      | I   | Huang-huai Winter Wheat Region                        |
|       | Xuke718              | 15   | R          | cultivar      | I   | Huang-huai Winter Wheat Region                        |
|       | Yuqiumai             | 15.2 | MR         | landrace      | I   | Southwestern Winter Wheat Region                      |
|       | OPATA                | 15.2 | MR         | cultivar      | S   | Mexico                                                |
|       | Xibei612             | 15.2 | MR         | cultivar      | W   | Huang-huai Winter Wheat Region                        |
|       | Liaomai16            | 15.5 | MR         | cultivar      | I   | Huang-huai Winter Wheat Region                        |
|       | Owens                | 16.7 | MR         | cultivar      | S   | the United States                                     |
|       | Jimai38xinxi         | 17.1 | MR         | cultivar      | I   | Northern Winter Wheat Region                          |
|       | Luomai26             | 18.1 | MR         | cultivar      | I   | Huang-huai Winter Wheat Region                        |
|       | Aguilal              | 18.2 | MR         | cultivar      | S   | Morocco                                               |
|       | Zhongmai895          | 18.3 | MR         | cultivar      | I   | Northern Winter Wheat Region                          |
|       | Heng6632             | 18.5 | MR         | cultivar      | I   | Huang-huai Winter Wheat Region                        |
|       | Baihuamai            | 18.6 | MR         | landrace      | S   | Southwestern Winter Wheat Region                      |
|       | Ron 2-Fnd×CMH74A.630 | 18.6 | MR         | breeding line | S   | Mexico                                                |
|       | Yumai13              | 19   | MR         | cultivar      | S   | Southwestern Winter Wheat Region                      |
|       | Mianyang26           | 19.2 | MR         | cultivar      | S   | Southwestern Winter Wheat Region                      |
|       | Lantian31            | 19.2 | MR         | cultivar      | W   | Northwestern Spring Wheat Region                      |

|      |                      |      |    |               |    |                                                       |
|------|----------------------|------|----|---------------|----|-------------------------------------------------------|
|      | Zhenmai168           | 19.4 | MR | cultivar      | S  | Winter Wheat Region of Middle and Lower Yangtze River |
|      | VAIOLET              | 19.8 | MR | cultivar      | NA | the United States                                     |
|      | Soissons             | 20   | MR | cultivar      | W  | France                                                |
|      | Zhongyu12            | 20.1 | MR | cultivar      | I  | Huang-huai Winter Wheat Region                        |
|      | Shuiyuan86           | 20.4 | MR | cultivar      | W  | Korea                                                 |
|      | Boai7023             | 20.4 | MR | cultivar      | S  | Huang-huai Winter Wheat Region                        |
|      | Zhongmai99           | 22.1 | MR | breeding line | I  | Huang-huai Winter Wheat Region                        |
|      | Jichun1016           | 22.5 | MR | cultivar      | S  | Northeastern Spring Wheat Region                      |
| 2020 | Youmanghong7         | 6.3  | R  | cultivar      | W  | Northern Winter Wheat Region                          |
|      | Yanmai8911           | 9    | R  | cultivar      | I  | Huang-huai Winter Wheat Region                        |
|      | RED EGYPTIAN         | 10.1 | R  | landrace      | S  | Egypt                                                 |
|      | Huximai              | 10.4 | R  | landrace      | I  | Winter Wheat Region of Middle and Lower Yangtze River |
|      | GEHEN KANAK          | 10.4 | R  | landrace      | S  | Indonesia                                             |
|      | Mazhamai             | 11.1 | R  | landrace      | I  | Huang-huai Winter Wheat Region                        |
|      | Yuqiumai             | 11.5 | R  | landrace      | I  | Southwestern Winter Wheat Region                      |
|      | Sifangmai            | 12.5 | R  | landrace      | S  | Southwestern Winter Wheat Region                      |
|      | Zhenmai168           | 12.9 | R  | cultivar      | S  | Winter Wheat Region of Middle and Lower Yangtze River |
|      | Xinong509            | 13.9 | R  | cultivar      | I  | Huang-huai Winter Wheat Region                        |
|      | Dawson               | 14.2 | R  | cultivar      | W  | Canada                                                |
|      | Freedom              | 14.2 | R  | cultivar      | W  | the United States                                     |
|      | Xinyang12            | 14.2 | R  | cultivar      | S  | Huang-huai Winter Wheat Region                        |
|      | Zimai12              | 15   | R  | cultivar      | I  | Huang-huai Winter Wheat Region                        |
|      | Yumai70              | 15.3 | MR | cultivar      | I  | Huang-huai Winter Wheat Region                        |
|      | Ron 2-Fnd×CMH74A.630 | 15.8 | MR | breeding line | S  | Mexico                                                |
|      | Fothand              | 16.3 | MR | NA            | NA | NA                                                    |
|      | Dahuangpi            | 16.3 | MR | landrace      | I  | Winter Wheat Region of Middle and Lower Yangtze River |
|      | Aguilal              | 16.4 | MR | cultivar      | S  | Morocco                                               |
|      | Yunmai34             | 16.5 | MR | cultivar      | S  | Southwestern Winter Wheat Region                      |
|      | SIRMIONE             | 16.7 | MR | cultivar      | W  | Italy                                                 |
|      | Mianyang26           | 16.7 | MR | cultivar      | S  | Southwestern Winter Wheat Region                      |

|              |      |    |               |    |                                                       |
|--------------|------|----|---------------|----|-------------------------------------------------------|
| Ganmai8      | 16.7 | MR | cultivar      | S  | Northwestern Spring Wheat Region                      |
| Humai15-1    | 16.7 | MR | cultivar      | S  | Winter Wheat Region of Middle and Lower Yangtze River |
| Luyuan502    | 16.7 | MR | cultivar      | I  | Huang-huai Winter Wheat Region                        |
| Changzhi6406 | 17.2 | MR | cultivar      | W  | Northern Winter Wheat Region                          |
| Chayazheda29 | 17.3 | MR | landrace      | S  | Qinghai-Tibet Spring and Winter Wheat Region          |
| Xibei612     | 17.4 | MR | cultivar      | W  | Huang-huai Winter Wheat Region                        |
| Zhongyu12    | 17.4 | MR | cultivar      | I  | Huang-huai Winter Wheat Region                        |
| Wanmai19     | 17.8 | MR | cultivar      | I  | Winter Wheat Region of Middle and Lower Yangtze River |
| Colt         | 17.9 | MR | cultivar      | W  | the United States                                     |
| Owens        | 18.1 | MR | cultivar      | S  | the United States                                     |
| VAIOLET      | 18.1 | MR | cultivar      | NA | the United States                                     |
| Jichun1016   | 18.1 | MR | cultivar      | S  | Northeastern Spring Wheat Region                      |
| Gaoyou2018   | 18.1 | MR | cultivar      | I  | Northern Winter Wheat Region                          |
| Liaomai16    | 18.3 | MR | cultivar      | I  | Huang-huai Winter Wheat Region                        |
| Heng6632     | 18.3 | MR | cultivar      | I  | Huang-huai Winter Wheat Region                        |
| RIETI        | 18.3 | MR | landrace      | W  | Italy                                                 |
| PURPLESTRAW  | 18.3 | MR | cultivar      | I  | the United States                                     |
| Sumai3       | 18.3 | MR | cultivar      | S  | Winter Wheat Region of Middle and Lower Yangtze River |
| Xiaoyan81    | 18.8 | MR | cultivar      | I  | Huang-huai Winter Wheat Region                        |
| Bohemia      | 19.4 | MR | cultivar      | W  | Czech                                                 |
| Zhengmai9405 | 19.4 | MR | cultivar      | I  | Huang-huai Winter Wheat Region                        |
| Linmai4      | 19.4 | MR | cultivar      | I  | Northwestern Spring Wheat Region                      |
| Pusa 6       | 19.6 | MR | landrace      | W  | Indonesia                                             |
| Suneca       | 19.6 | MR | cultivar      | S  | Australia                                             |
| Jinmai30     | 19.7 | MR | cultivar      | I  | Northern Winter Wheat Region                          |
| Yannong19    | 19.7 | MR | cultivar      | W  | Huang-huai Winter Wheat Region                        |
| OPATA        | 20   | MR | cultivar      | S  | Mexico                                                |
| Huaimai25    | 20   | MR | cultivar      | I  | Winter Wheat Region of Middle and Lower Yangtze River |
| Vicam F70    | 20   | MR | breeding line | S  | Mexico                                                |
| Yumai15      | 20.1 | MR | cultivar      | I  | Huang-huai Winter Wheat Region                        |

---

|          |      |    |          |   |                                |
|----------|------|----|----------|---|--------------------------------|
| Luomai26 | 20.4 | MR | cultivar | I | Huang-huai Winter Wheat Region |
|----------|------|----|----------|---|--------------------------------|

---

S represents that the variety is a spring variety/line, W is a winter variety/line, I is a semi-winter variety/line, and NA is missing information.
